# Supplementary material for: Effect of hydrostatic pressure on charge carriers in a conducting pyrrole-co-poly(pyrrole-3-carboxylic) copolymer
Source: Royal Society of Chemistry journal article supplement (doi:10.1039/d4cp01087f), 2024-01-01
Supplement: d4cp01087f1.pdf [file d4cp01087f1.pdf]

## Supplementary Material for

### Effect of hydrostatic pressure on charge carriers in conducting pyrrole-*co*-poly(pyrrole-3-carboxylic) copolymer

Adam Mizera<sup>1,\*</sup>, Sylwia Zięba<sup>1</sup>, Michał Bielejewski<sup>1</sup>, Alina T. Dubis<sup>2</sup>, Andrzej Łapiński<sup>1\*</sup>

<sup>1</sup>Institute of Molecular Physics, Polish Academy of Sciences, M. Smoluchowskiego 17, 60-179, Poznań, Poland

<sup>2</sup>Department of Chemistry, University of Białystok, Ciołkowskiego 1K, 15-245, Białystok, Poland

Corresponding author: [mizera@ifmpan.poznan.pl](mailto:mizera@ifmpan.poznan.pl); [lapinski@ifmpan.poznan.pl](mailto:lapinski@ifmpan.poznan.pl)

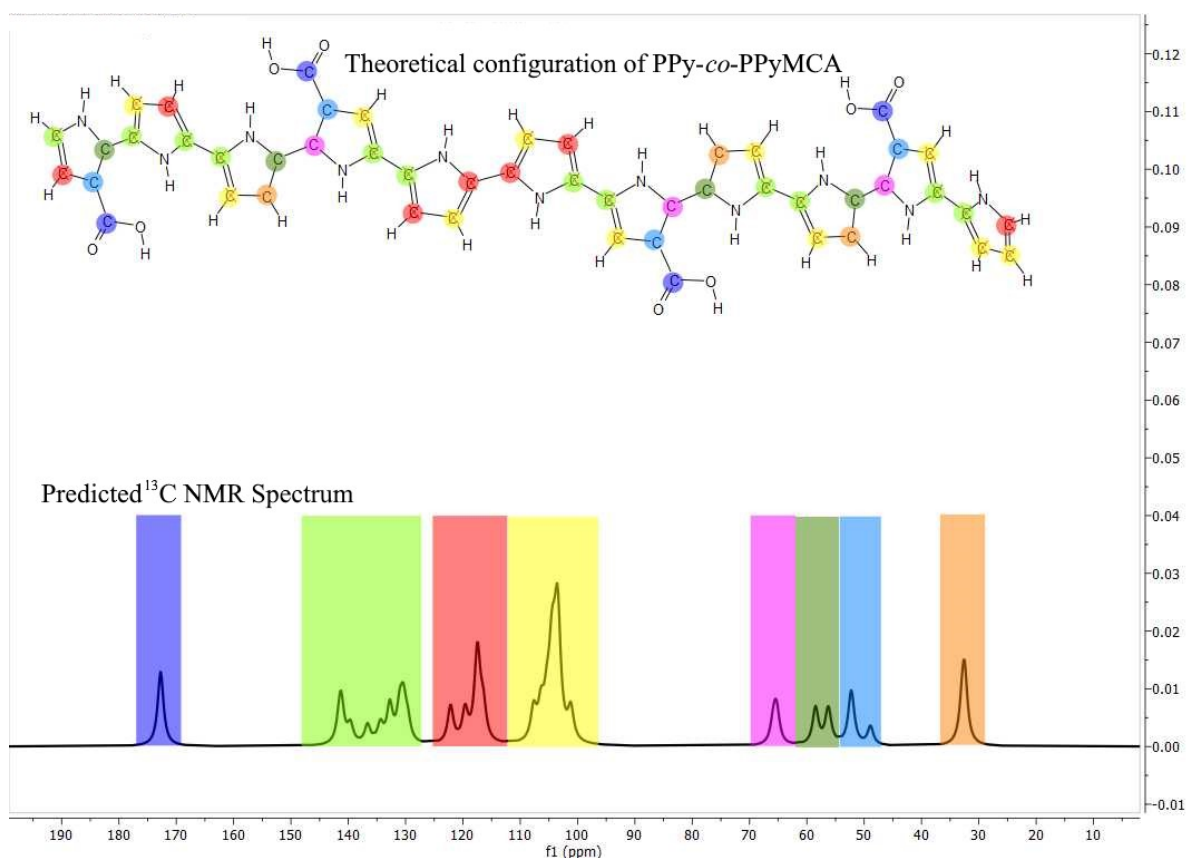

**Figure S1.** Theoretical NMR spectrum for the predicted configuration of PPy-*co*-PPyMCA. Colors indicate bands associated with signals from individual carbons.

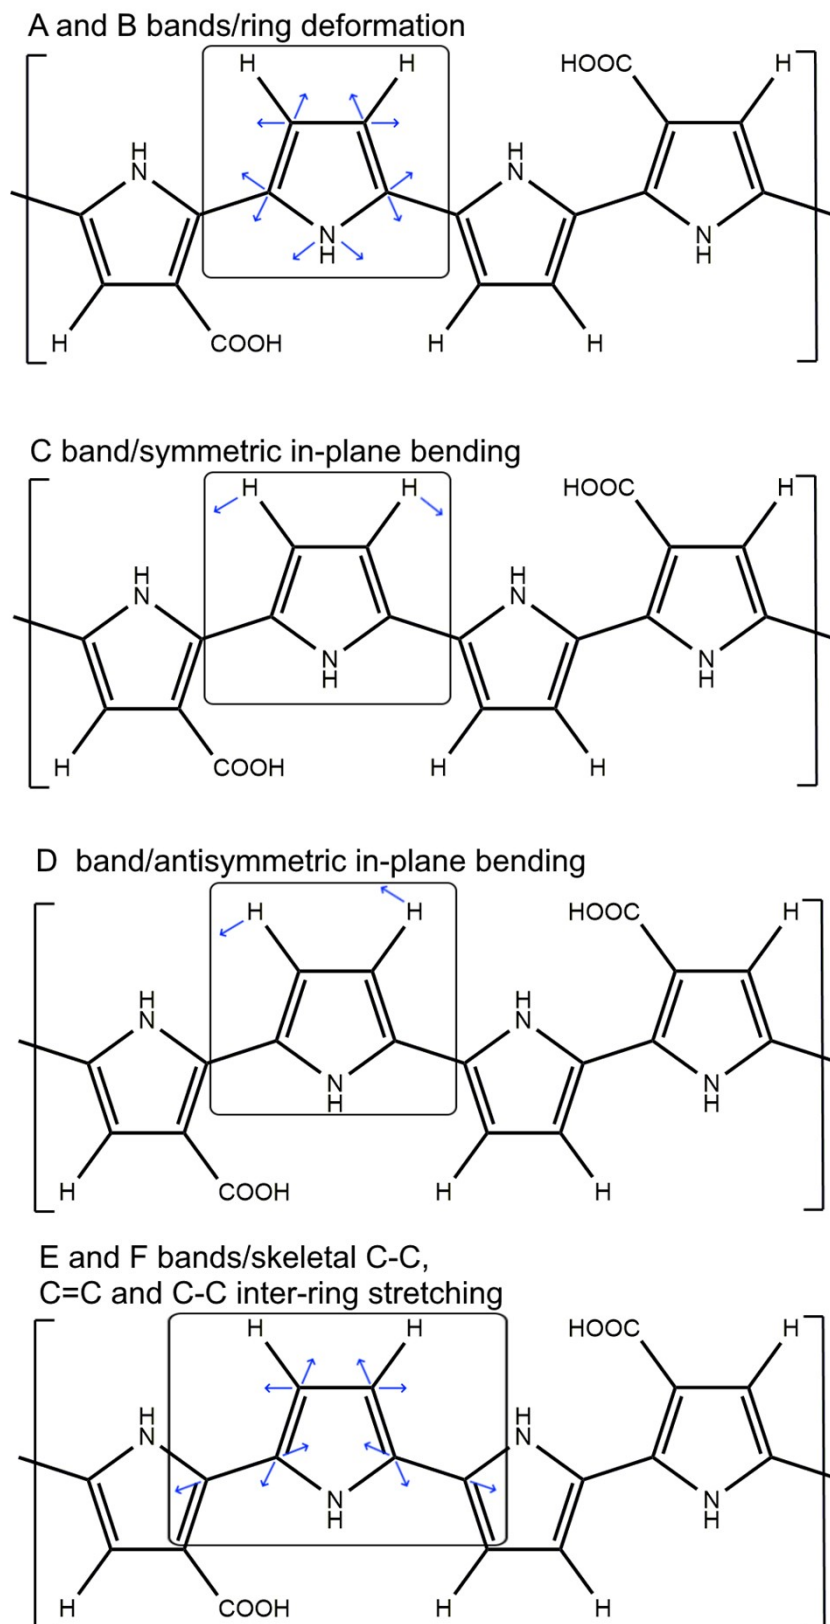

**Figure S2.** Normal mode sketches of PPy-co-PPyMCA.
